# Supplementary material
Source: PubMed Central journal article supplement (PMC4018121)
Supplement: ac500466x_si_001.pdf [file ac500466x_si_001.pdf]

# **Identification of cell membrane protein stress-induced-phosphoprotein 1 (STIP1) as a potential ovarian cancer biomarker using aptamers selected by cell-SELEX**

## **Identification of cell membrane protein stress-induced-phosphoprotein 1 (STIP1) as a potential ovarian cancer biomarker using aptamers selected by cell-SELEX**

Dimitri Van Simaey, Diane Turek, Carole Champanhac, Julia Vaizer, Kwame Sefah, Jing Zhen, Rebecca Sutphen, Weihong Tan\*

Center for Research at Bio/Nano Interface, Department of Chemistry and Department of Physiology and Functional Genomics, Shands Cancer Center, UF Genetics Institute and McKnight Brain Institute, University of Florida Gainesville, Florida, 32611-7200, USA; Molecular Science and Biomedicine Laboratory, State Key Laboratory of Chemo/Bio-Sensing and Chemometrics, College of Chemistry and Chemical Engineering, College of Biology, Collaborative Innovation Center for Chemistry and Molecular Medicine, Hunan University, Changsha, 410082, China; Morsani School of Medicine, University of South Florida, Tampa, Florida, USA

## **Supplemental Figures**

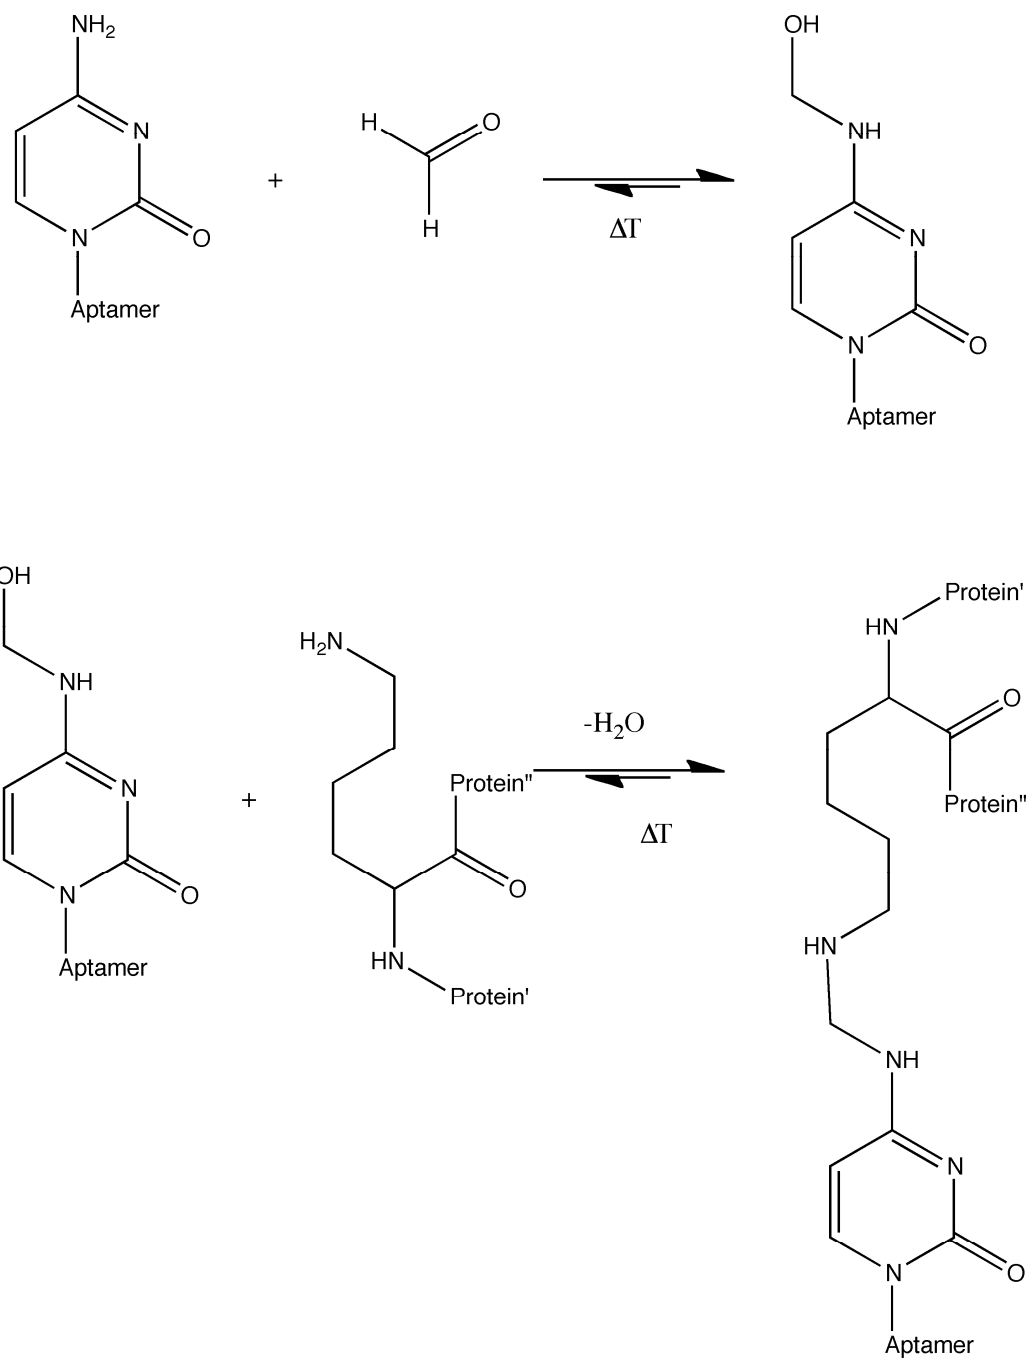

Supplemental Scheme1. The chemistry of formaldehyde mediated DNA-Protein crosslinking. In this example cytidine crosslinks to a lysine. The crosslink can be reversed by applying heat ( $>72^\circ\text{C}$ ).

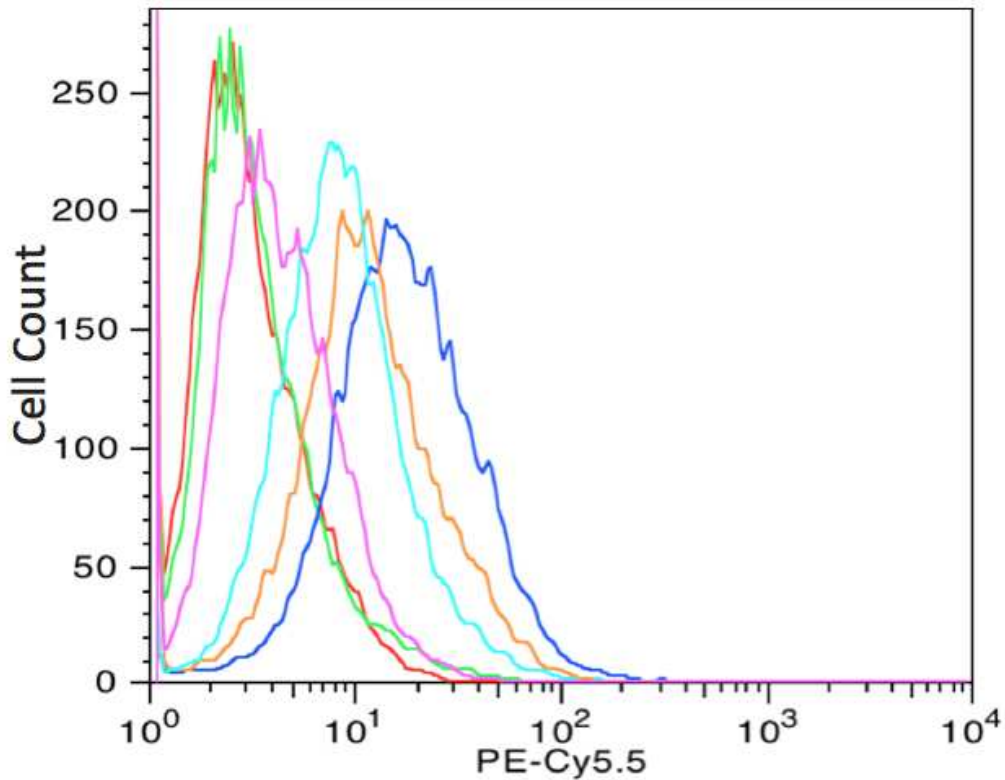

Supplemental Figure 1: Study of the effect of formaldehyde on streptavidin-fluorescent dye binding and recovery of the aptamer-protein hybrid by biotin elution of the desthiobiotin-conjugated aptamer. Red: TOV-21G without oligonucleotides; Green: Library; Dark blue: TOV6; Orange: TOV6 in 1%  $\text{CH}_2\text{O}$  for 10 minutes; Light blue: TOV6 after 30 minutes in 5mM biotin solution; Magenta: TOV6 in 1%  $\text{CH}_2\text{O}$  for 10 minutes after 30 minutes in 5mM biotin solution. A loss in fluorescence indicates the competition between biotin and desthiobiotin.

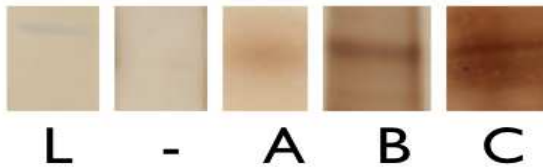

Supplemental Figure 2: Optimization of crosslinking time with 1% crosslinking solution. L: Ladder band at 80 kDa; '-': Band from naïve library; A: 1 minute of crosslinking time; B: 2 minutes of crosslinking time; C: 10 minutes of crosslinking time. After one minute of crosslinking time, a band is faintly visible, but does not yield enough protein for mass spectral analysis. After 10 minutes of crosslinking time, a band is visible, but nonspecific crosslinking between the target and cellular protein forms, making analysis difficult by the presence of streaks around the band of interest.

| Random oligonucleotide                                                            | TOV6 + BSA                                                                        | TOV6 + rhStIP1                                                                      |
|-----------------------------------------------------------------------------------|-----------------------------------------------------------------------------------|-------------------------------------------------------------------------------------|
|  |  |  |

Supplemental Figure 3 : Chemiluminescent blot of rhSTIP1. The aptamer is able to induce a strong chemiluminescent signal with rhSTIP1, but not with BSA. When staining the protein with library, no luminescence can be observed.

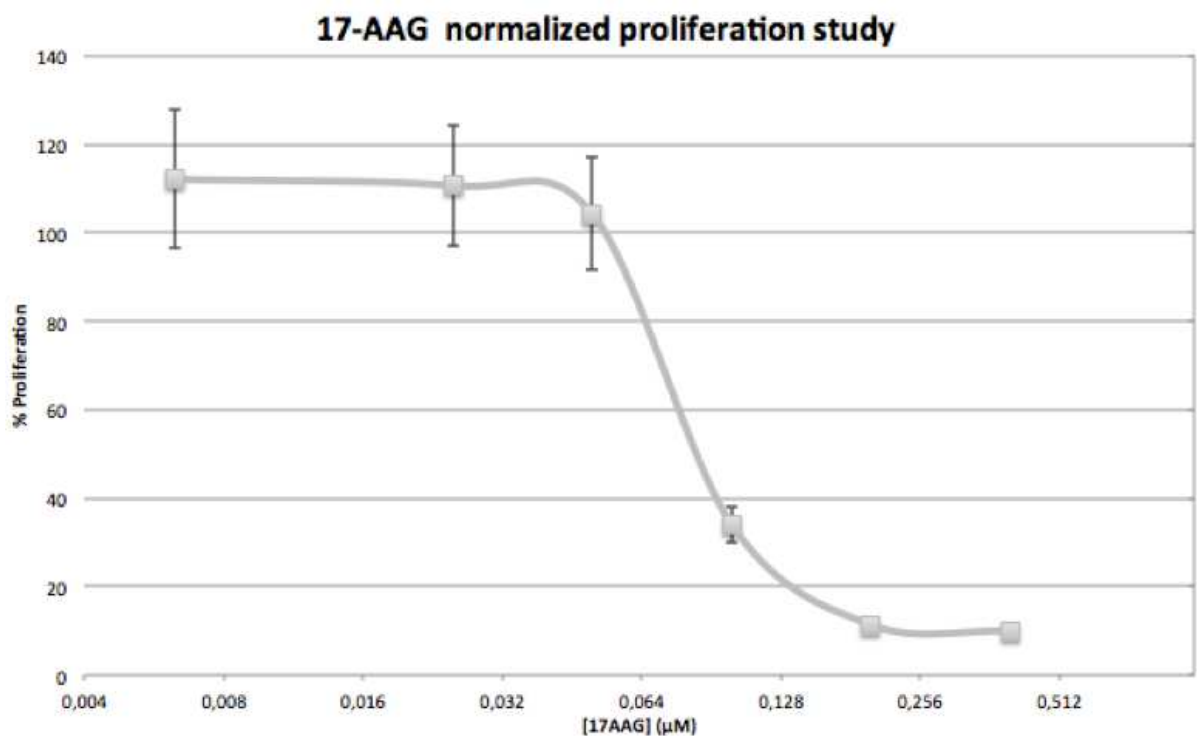

Supplemental Figure 4: Normalized proliferation study of TOV-21G. After three days of incubation with 17AAG, the IC<sub>50</sub> was determined to be 0.060µM by nonlinear regression in JMP. The error bars give the standard deviation (n = 3).

**Supplemental Table 1.** Proteins found in aptamer TOV6 binding fractions (78kDa). STIP1 was the only top protein found in both samples sent for analysis. Each column represents the protein hits for each sample.

| Sample 1            |                                     | Sample 2            |                          |
|---------------------|-------------------------------------|---------------------|--------------------------|
| Protein matches     |                                     | Protein matches     |                          |
| Peptides identified | Gene annotation                     | Peptides identified | Gene annotation          |
| 5                   | STIP1_IPI:IPI00013894.1             | 34                  | LMNA_IPI:IPI00021405.3   |
| 4                   | ALB_IPI:IPI00022434.4               | 32                  | FLNA_IPI:IPI00302592.2   |
| 4                   | TKT_IPI:IPI00643920.3               | 23                  | HNRNPM_IPI:IPI00171903.2 |
| 3                   | HSPA1A_IPI:IPI00304925.5            | 21                  | STIP1_IPI:IPI00013894.1  |
| 3                   | HSPA8_IPI:IPI00003865.1             | 20                  | CKAP4_IPI:IPI00141318.2  |
| 3                   | RPN1_IPI:IPI00025874.2              | 19                  | RPN1_IPI:IPI00025874.2   |
| 3                   | NCL_IPI:IPI00444262.3               | 18                  | TKT_IPI:IPI00643920.3    |
| 3                   | ACTA2_IPI:IPI00008603.1             | 16                  | NOP56_IPI:IPI00411937.4  |
| 2                   | IPI:IPI00550731.2_IPI:IPI00550731.2 | 16                  | DDX5_IPI:IPI00017617.1   |
| 2                   | HSPA5_IPI:IPI00003362.2             | 13                  | XRCC5_IPI:IPI00220834.8  |
| 2                   | TUBA1C_IPI:IPI00166768.3            | 13                  | LMNB1_IPI:IPI00217975.4  |
| 2                   | ACTBL2_IPI:IPI00003269.1            | 12                  | CLTC_IPI:IPI00024067.4   |
| 2                   | ANXA2P2_IPI:IPI00334627.3           | 12                  | RPA1_IPI:IPI00020127.1   |
| 2                   | GAPDH_IPI:IPI00219018.7             | 12                  | MATR3_IPI:IPI00017297.1  |
| 2                   | PKM2_IPI:IPI00220644.8              | 10                  | HSPA8_IPI:IPI00003865.1  |
| 1                   | ENO1_IPI:IPI00465248.5              | 10                  | NCL_IPI:IPI00183526.6    |

**Supplemental Table 2:** Proteins found in aptamer TOV6 binding fractions (110kDa).

| Protein matches     |                           |
|---------------------|---------------------------|
| Peptides identified | Gene annotation           |
| 30                  | EEF2_IPI:IPI00186290.6    |
| 28                  | CLTC_IPI:IPI00024067.4    |
| 28                  | HSP90B1_IPI:IPI00027230.3 |
| 27                  | PYGB_IPI:IPI00004358.4    |
| 21                  | PRKDC_IPI:IPI00296337.2   |
| 20                  | KPNB1_IPI:IPI00001639.2   |
| 18                  | AP2A2_IPI:IPI00016621.7   |
| 18                  | NCL_IPI:IPI00183526.6     |
| 17                  | COPG_IPI:IPI00783982.1    |
| 16                  | SFPQ_IPI:IPI00010740.1    |
| 14                  | TRIM28_IPI:IPI00438229.2  |
| 14                  | MATR3_IPI:IPI00017297.1   |
| 14                  | TOP1_IPI:IPI00413611.1    |
| 13                  | TLN1_IPI:IPI00298994.6    |

**Supplemental Table 3.** Proteins found in aptamer TOV6 binding fractions (50kDa).

| Protein matches     |                            |
|---------------------|----------------------------|
| Peptides identified | Gene annotation            |
| 21                  | HNRNPM_IPI:IPI00171903.2   |
| 14                  | PKM2_IPI:IPI00220644.8     |
| 12                  | VIM_IPI:IPI00418471.6      |
| 12                  | FLNA_IPI:IPI00302592.2     |
| 11                  | ACTB_IPI:IPI00021439.1     |
| 11                  | HNRNPK_IPI:IPI00216049.1   |
| 11                  | SCIN_IPI:IPI00002606.5     |
| 10                  | ACAT1_IPI:IPI00030363.1    |
| 10                  | HNRNPA3_IPI:IPI00419373.1  |
| 10                  | PGK1_IPI:IPI00169383.3     |
| 9                   | SERPINB9_IPI:IPI00032139.1 |
| 9                   | HNRNPD_IPI:IPI00028888.1   |
| 9                   | ALDOA_IPI:IPI00465439.5    |
| 9                   | TUBA4A_IPI:IPI00007750.1   |
| 8                   | TUBB2C_IPI:IPI00007752.1   |
| 8                   | PRMT1_IPI:IPI00018522.4    |

**Supplemental Table 4.** Proteins found in aptamer TOV6 binding fractions (46 kDa).

| Protein matches     |                             |
|---------------------|-----------------------------|
| Peptides identified | Gene annotation             |
| 13                  | PKM2_IPI:IPI00220644.8      |
| 9                   | VIM_IPI:IPI00418471.6       |
| 8                   | ANXA2P2_IPI:IPI00334627.3   |
| 8                   | HNRNPH3_IPI:IPI00013877.2   |
| 8                   | TUBA4A_IPI:IPI00007750.1    |
| 8                   | AKR1B1_IPI:IPI00413641.7    |
| 7                   | HDGF_IPI:IPI00020956.1      |
| 7                   | ANXA1_IPI:IPI00218918.5     |
| 7                   | XRCC6_IPI:IPI00644712.4     |
| 7                   | CRYZ_IPI:IPI00000792.1      |
| 6                   | TUBB2C_IPI:IPI00007752.1    |
| 6                   | LASP1_IPI:IPI00000861.1     |
| 6                   | NPM1_IPI:IPI00220740.1      |
| 6                   | HNRNPA2B1_IPI:IPI00396378.3 |
| 6                   | HNRNPM_IPI:IPI00171903.2    |
| 5                   | HNRNPA1_IPI:IPI00215965.2   |
| 5                   | CRYL1_IPI:IPI00006443.3     |
| 5                   | ELAVL1_IPI:IPI00301936.4    |



**Supplemental Table 5.** Proteins found in aptamer TOV6 binding fractions (58kDa).

| Protein matches     |                                 |
|---------------------|---------------------------------|
| Peptides identified | Gene annotation                 |
| 17                  | VIM_IPI: IPI00418471.6          |
| 16                  | PKM2_IPI: IPI00220644.8         |
| 16                  | LMNA_IPI: IPI00021405.3         |
| 14                  | ENO1_IPI: IPI00465248.5         |
| 14                  | FLNA_IPI: IPI00302592.2         |
| 14                  | HNRNPK_IPI: IPI00216049.1       |
| 12                  | HNRNPM_IPI: IPI00171903.2       |
| 11                  | DCTN2_IPI: IPI00220503.9        |
| 11                  | CLTC_IPI: IPI00024067.4         |
| 11                  | SSB_IPI: IPI00009032.1          |
| 11                  | HADHB_IPI: IPI00022793.5        |
| 10                  | PGD_IPI: IPI00219525.1          |
| 10                  | HNRNPF_IPI: IPI00003881.5       |
| 10                  | GDI2_IPI: IPI00031461.2         |
| 9                   | SERPINH1_IPI: IPI00032140.<br>4 |
| 9                   | TUBB2C_IPI: IPI00007752.1       |

**Supplemental Table 6.** The binding of aptamer TOV6 in ovarian cancer cell lines

| Cell line | TOV-21G | SKOV-3 | CAOV3 | OVCAR-3 | OVCAR-8 | C13 | A2780s | A2780cp |
|-----------|---------|--------|-------|---------|---------|-----|--------|---------|
| Binding   | +       | +      | -     | +       | -       | +   | -      | -       |
